# Supplementary figures and images for: CD36 is a sensor of diacylglycerides
Source: Springer Nature journal article supplement (doi:10.1038/nature03253), 2005-02-01

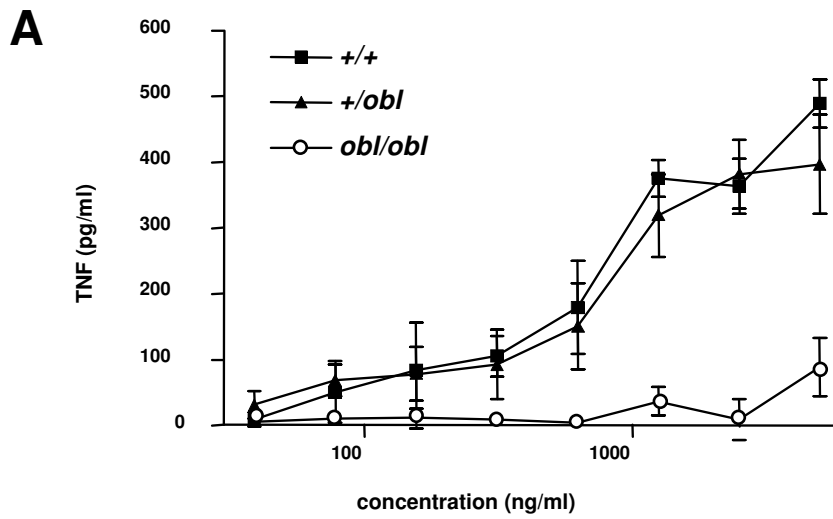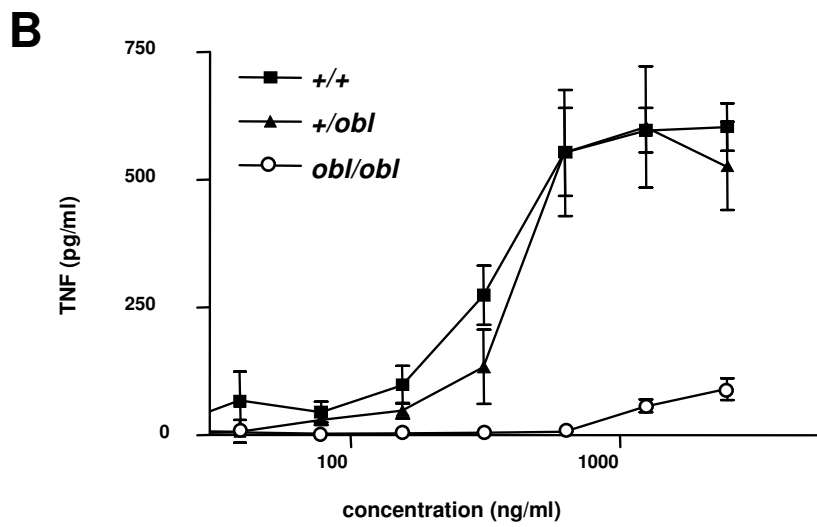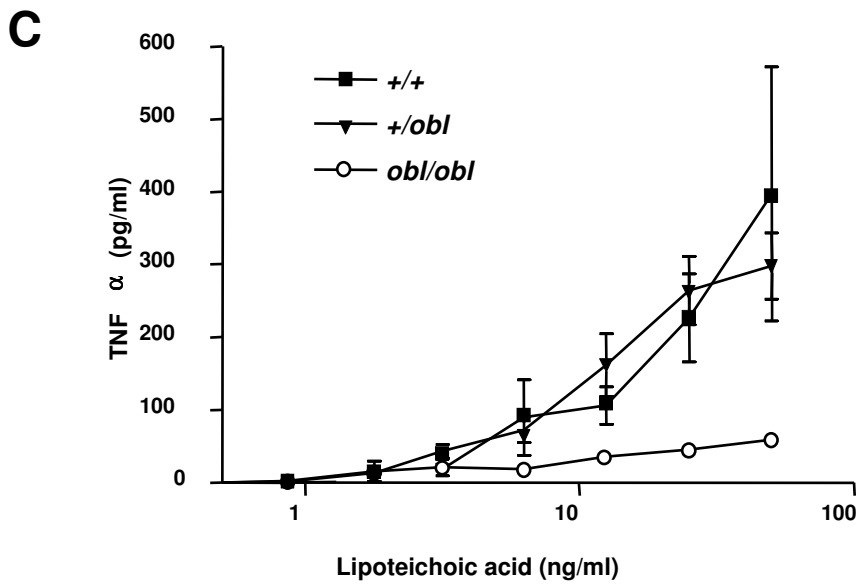

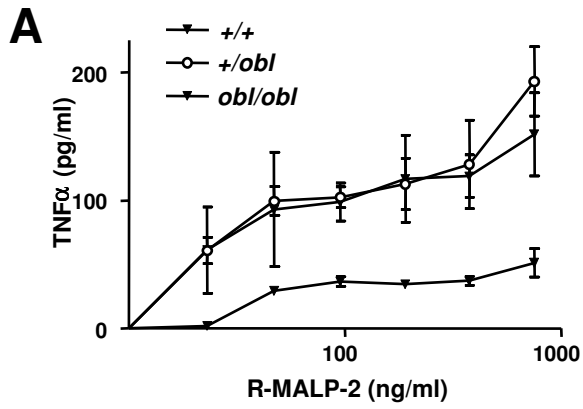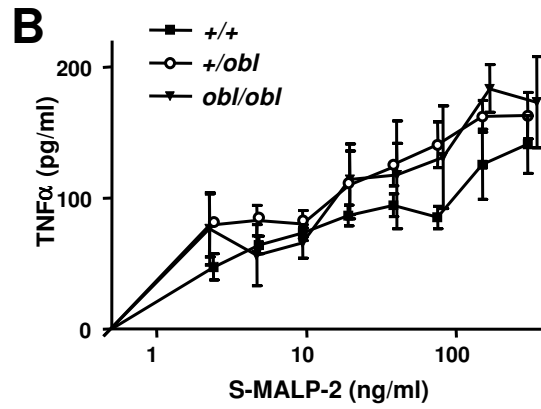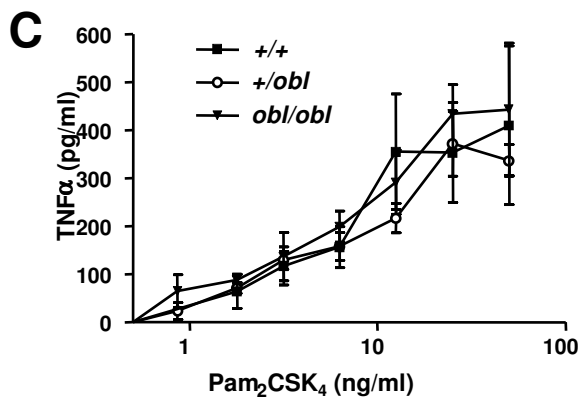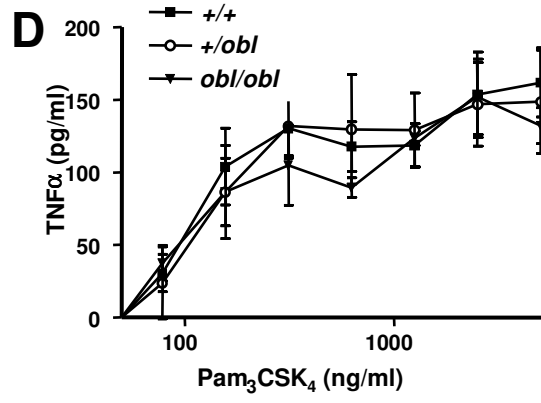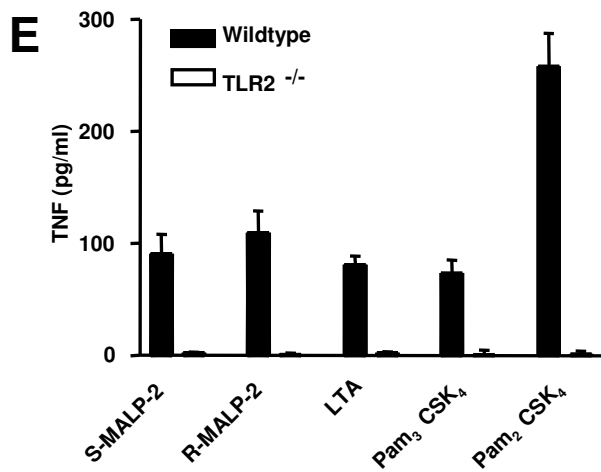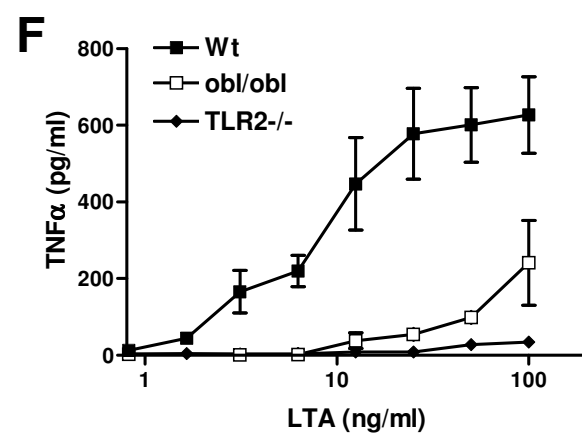

**A**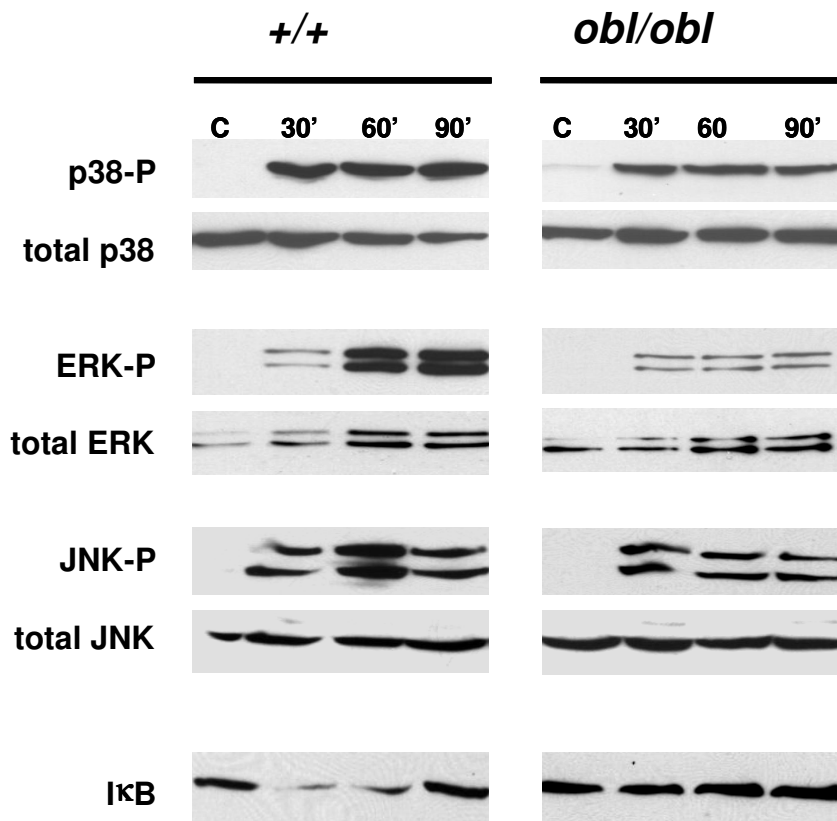**B**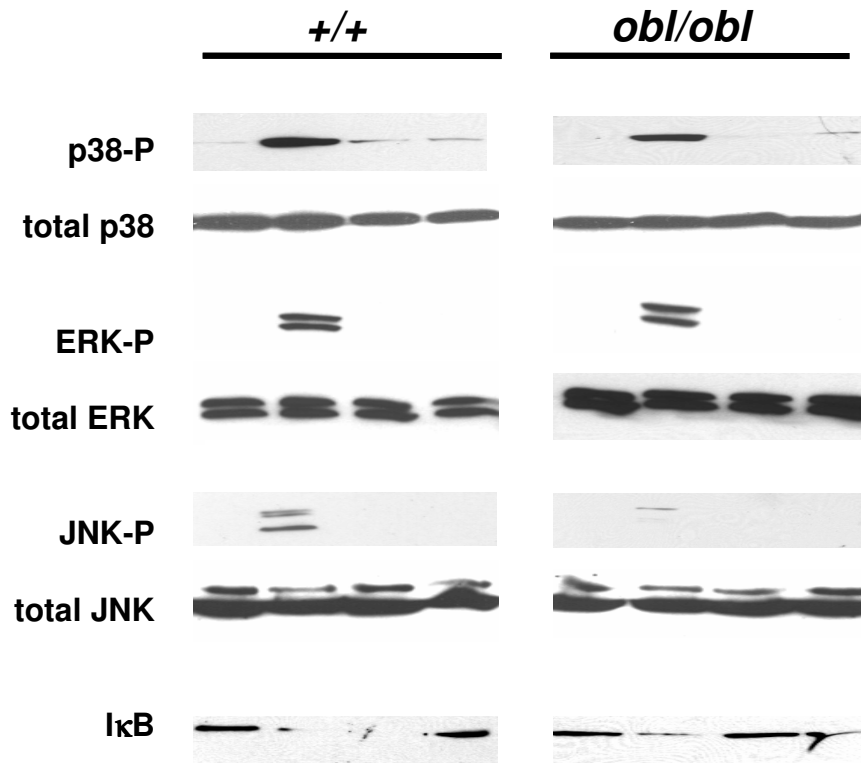

**A**

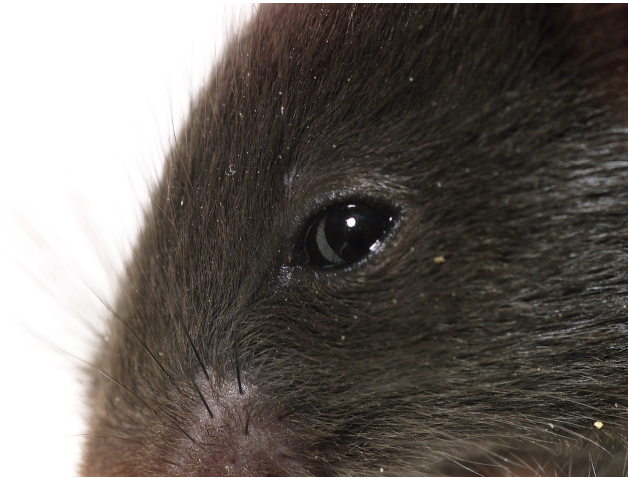

**B**

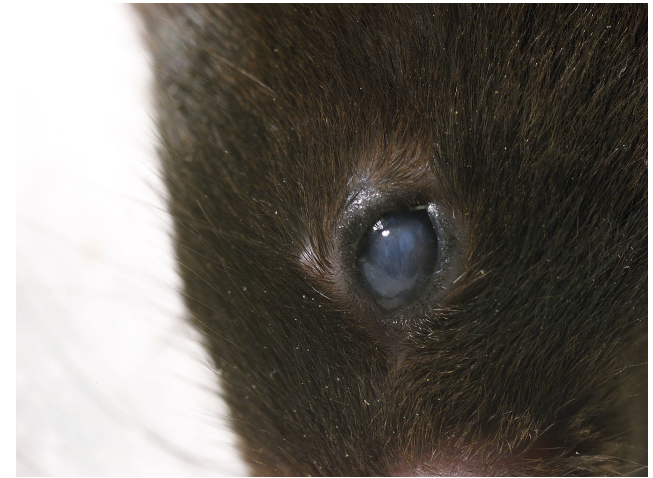

**C**

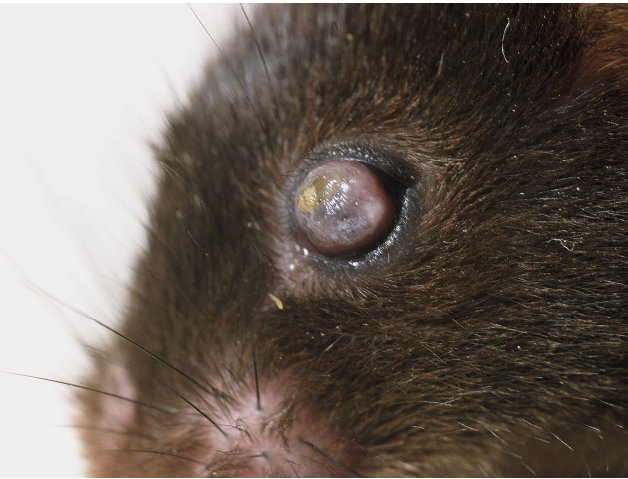

**D**

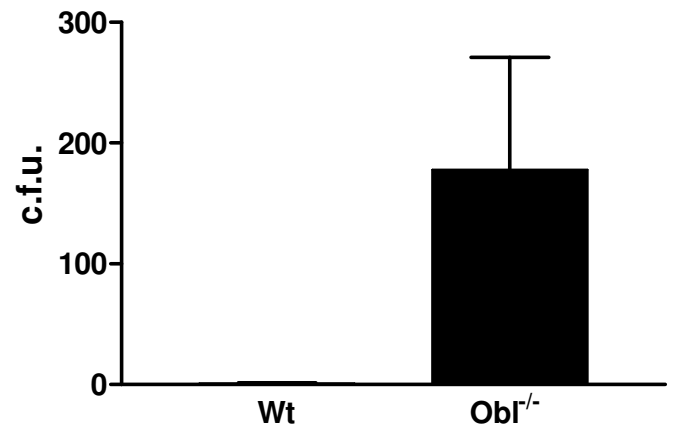

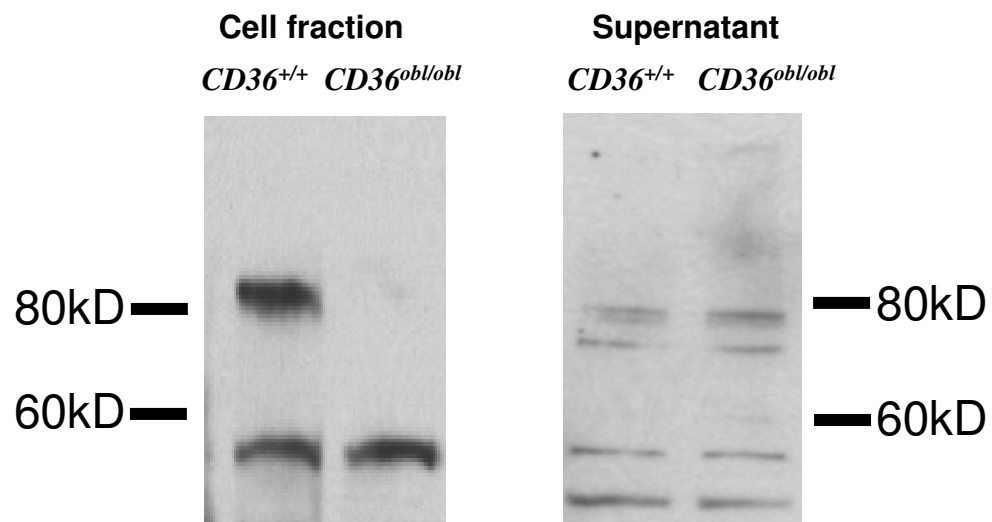

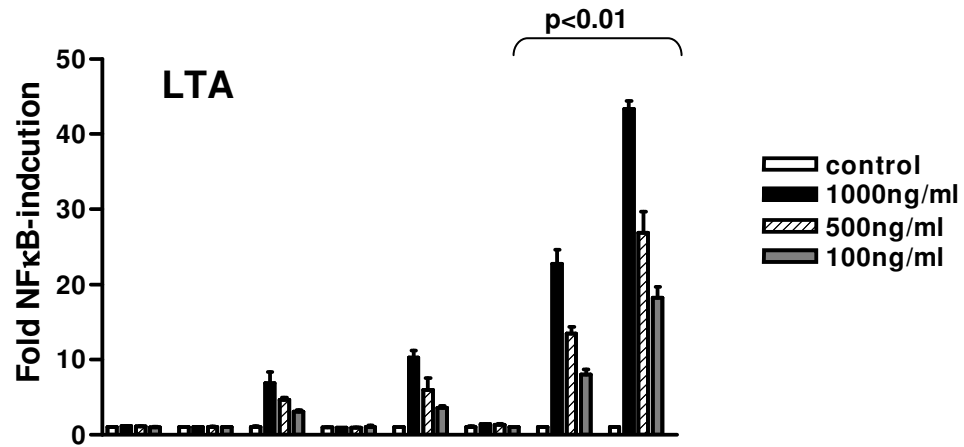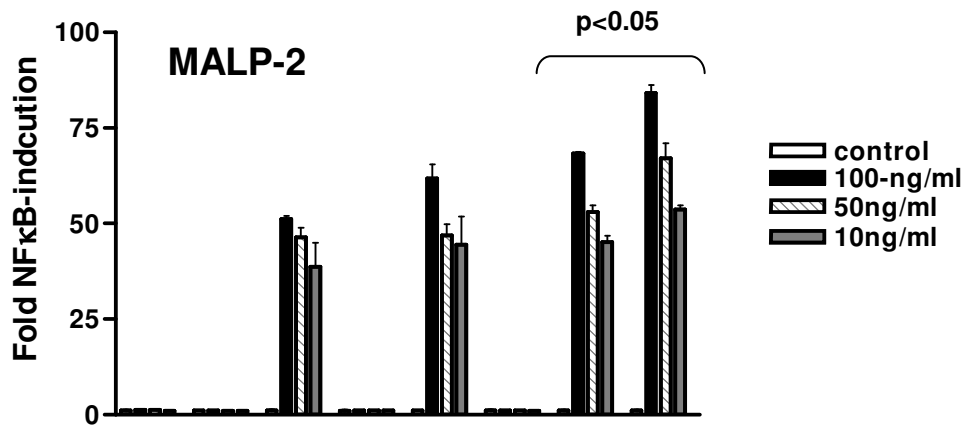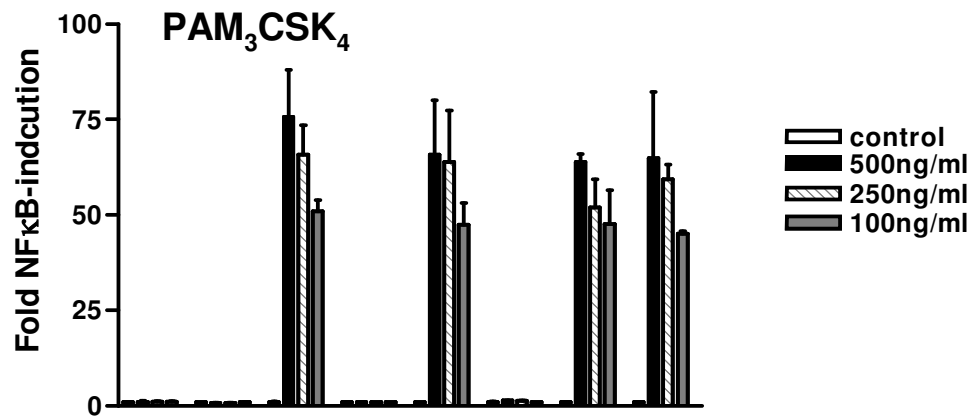

|                 |   |   |   |   |   |   |   |   |
|-----------------|---|---|---|---|---|---|---|---|
| Control vector: | + | + | + | + | + | + | + | - |
| CD36:           | - | + | - | - | + | + | - | + |
| TLR2:           | - | - | + | - | + | - | + | + |
| TLR6:           | - | - | - | + | - | + | + | + |

# CD36

# SR2

# SR1

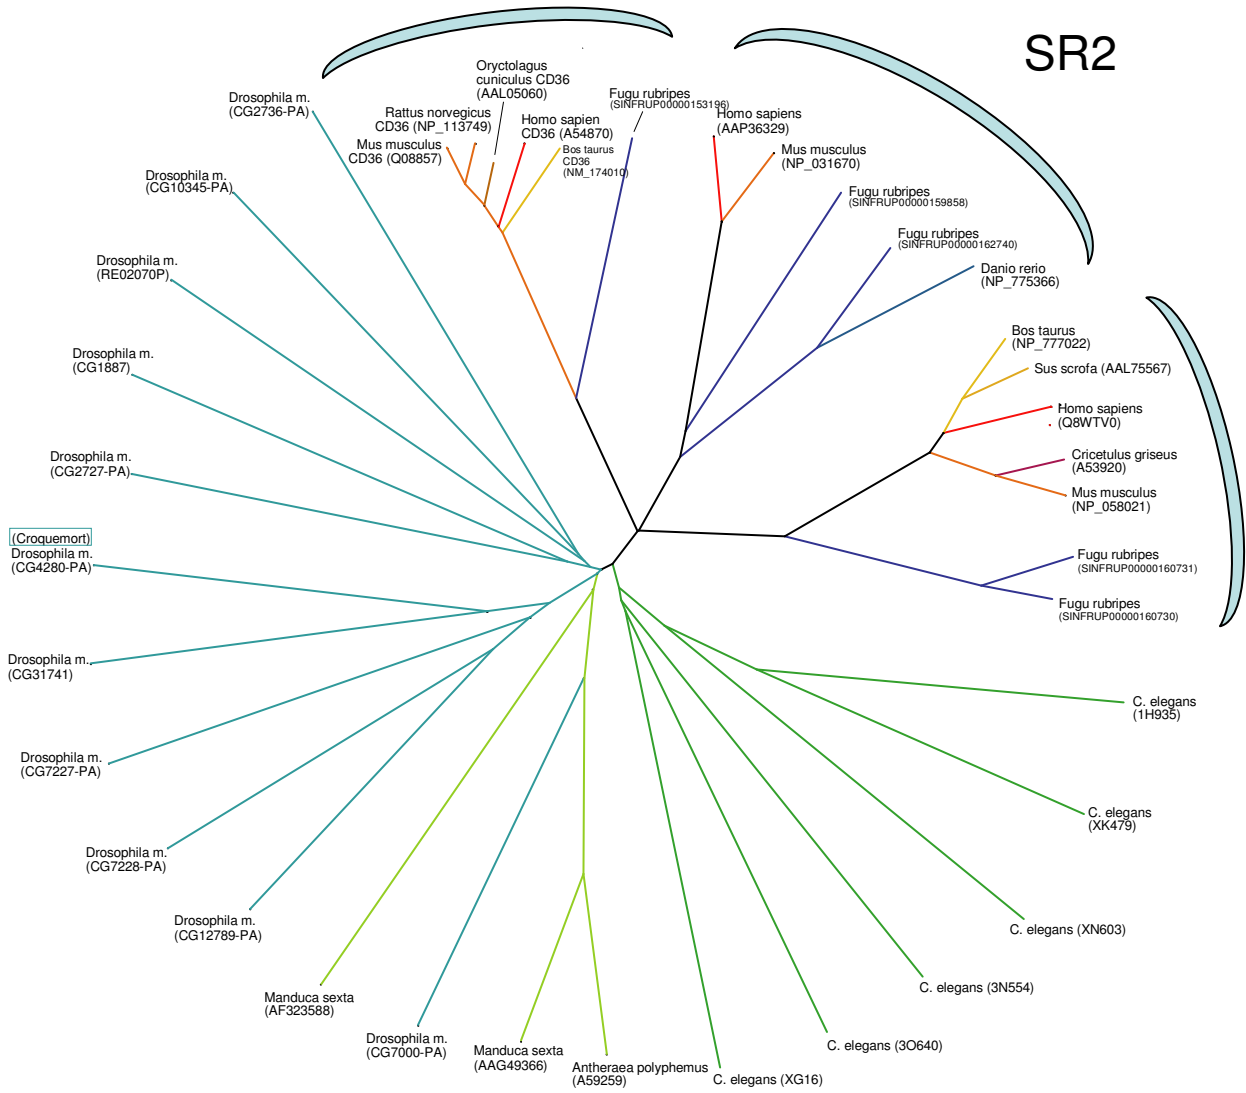

Supplement: 41586_2005_BFnature03253_MOESM1_ESM.pdf [file 41586_2005_BFnature03253_MOESM1_ESM.pdf]
